# Supplementary material for: Identification and Validation of a Potent Multi-lncRNA Molecular Model for Predicting Gastric Cancer Prognosis
Source: Front Genet. 2021 Dec 20;12:607748. doi: 10.3389/fgene.2021.607748 (PMC8720998; doi:10.3389/fgene.2021.607748)
Supplement: Supplementary file 5 [file Table1.XLSX]

## Sheet: Table 4 KEGG Functional
ID	Description	GeneRatio	BgRatio	pvalue	p.adjust	qvalue	geneID	Count
hsa00980	Metabolism of xenobiotics by cytochrome P450	26/562	76/7893	4.36745e-12	6.66342e-10	5.71614e-10	1565/27294/6822/218/222/2949/1559/1543/873/1576/22977/7364/2940/1645/131/125/7367/127/10720/54579/54658/54659/2938/2939/54577/54657	26
hsa05204	Chemical carcinogenesis	27/562	82/7893	4.74265e-12	6.66342e-10	5.71614e-10	6822/1562/218/222/2949/1559/1543/1646/10/873/1576/7364/2940/131/6817/125/6799/7367/127/10720/54579/54658/54659/2938/2939/54577/54657	27
hsa04080	Neuroactive ligand-receptor interaction	57/562	338/7893	4.64546e-10	4.35125e-08	3.73267e-08	6863/2556/6865/117/4295/2862/2906/2901/5539/887/2690/3827/2641/2891/4852/1908/2925/1907/2922/4829/1134/5746/185/90226/2569/7432/3358/64106/2895/2893/6750/51738/2695/886/2899/2898/2587/6866/3354/154/8862/23566/146/3952/9934/114131/2918/2147/1129/5179/5367/4887/4158/2558/2563/22953/155	57
hsa04974	Protein digestion and absorption	25/562	95/7893	5.95412e-09	4.18277e-07	3.58814e-07	477/11136/1301/1361/6564/1277/4224/3769/7512/1300/81578/482/59272/4225/1360/1358/1281/169044/340024/1287/4311/1288/643847/643834/5222	25
hsa00982	Drug metabolism - cytochrome P450	20/562	72/7893	7.53173e-08	4.23283e-06	3.63109e-06	1565/218/222/2949/1559/1576/7364/2940/131/125/7367/127/10720/54579/54658/54659/2938/2939/54577/54657	20
hsa00140	Steroid hormone biosynthesis	18/562	60/7893	9.28716e-08	4.34949e-06	3.73116e-06	1588/1583/1543/1586/1646/1576/1584/7364/1645/7367/3283/10720/54579/54658/54659/54577/54657/79154	18
hsa00830	Retinol metabolism	19/562	67/7893	1.11229e-07	4.46505e-06	3.83029e-06	50700/1562/9227/53630/1559/145226/1543/1576/7364/131/125/7367/127/10720/54579/54658/54659/54577/54657	19
hsa04975	Fat digestion and absorption	13/562	41/7893	2.89545e-06	0.000101703	8.72446e-05	338/337/335/948/64240/84647/4547/64241/2169/2168/80168/8513/391013	13
hsa03320	PPAR signaling pathway	18/562	76/7893	4.28579e-06	0.000133812	0.000114789	10580/5106/345/28965/335/5105/948/6258/2169/336/2168/2173/364/5346/729359/2167/4973/4312	18
hsa04976	Bile secretion	17/562	72/7893	8.26729e-06	0.000232311	0.000199285	477/6579/6523/6822/28234/9429/482/10599/570/64240/64241/1576/200931/361/111/123264/338821	17
hsa04971	Gastric acid secretion	16/562	75/7893	5.81648e-05	0.00148585	0.00127462	477/4638/815/495/887/5582/482/3773/6750/3772/9992/111/810/389015/2520/496	16
hsa00053	Ascorbate and aldarate metabolism	9/562	27/7893	6.46109e-05	0.00151297	0.00129789	55586/7364/7367/10720/54579/54658/54659/54577/54657	9
hsa04657	IL-17 signaling pathway	18/562	93/7893	7.96285e-05	0.00170286	0.00146078	6354/727897/27189/6372/2354/4322/5596/6279/6278/4314/6280/6374/2919/1437/3627/3576/225689/4312	18
hsa00040	Pentose and glucuronate interconversions	10/562	34/7893	8.48401e-05	0.00170286	0.00146078	27294/7364/7367/57016/10720/54579/54658/54659/54577/54657	10
hsa04970	Salivary secretion	17/562	90/7893	0.000170901	0.00320154	0.00274641	477/4842/1472/727897/5582/482/3778/491/154/1470/1469/146/111/810/155/6263/5542	17
hsa05150	Staphylococcus aureus infection	17/562	96/7893	0.000382019	0.00635327	0.00545008	3883/3881/25984/3882/3872/1828/2209/1670/1671/192666/3866/3860/54474/3868/3861/1675/2214	17
hsa00983	Drug metabolism - other enzymes	15/562	79/7893	0.000384362	0.00635327	0.00545008	2949/10/7498/1576/7364/2940/7367/10720/54579/54658/54659/2938/2939/54577/54657	15
hsa04512	ECM-receptor interaction	16/562	88/7893	0.000414456	0.00647013	0.00555032	3381/3918/8516/22798/1311/1277/6696/22987/948/1101/1834/1758/7148/7058/1287/1288	16
hsa04024	cAMP signaling pathway	29/562	214/7893	0.000557681	0.00824782	0.00707529	477/84699/815/117/10398/268/2906/2641/2891/4852/1908/1907/482/7137/7432/139760/2893/6750/51738/491/2695/3354/154/111/810/1129/4158/5350/5348	29
hsa04979	Cholesterol metabolism	11/562	50/7893	0.000627587	0.0088176	0.00756408	4036/338/337/345/335/341/948/64240/64241/336/255738	11
hsa04060	Cytokine-cytokine receptor interaction	36/562	294/7893	0.00089468	0.0119717	0.0102698	608/3589/268/6354/2690/8600/3624/3598/3623/27189/6372/27178/3976/9518/6370/3557/27179/26525/27177/4283/85480/651/6374/2919/1437/4982/3627/6373/3576/53833/3952/1237/3579/282616/282617/23495	36
hsa04924	Renin secretion	13/562	69/7893	0.00100102	0.0127858	0.0109681	1179/22802/117/1908/1907/9635/185/3778/1636/154/111/810/155	13
hsa04977	Vitamin digestion and absorption	7/562	24/7893	0.00106201	0.012975	0.0111305	113235/338/337/5948/335/9227/9963	7
hsa04972	Pancreatic secretion	16/562	102/7893	0.00214656	0.0251326	0.0215597	1179/22802/477/1361/1811/5582/482/9635/84647/1360/3778/491/1358/886/111/391013	16
hsa04911	Insulin secretion	14/562	86/7893	0.00280177	0.0314919	0.027015	477/84699/815/117/2641/5582/482/3779/139760/3778/2695/886/6514/111	14
hsa04973	Carbohydrate digestion and absorption	9/562	44/7893	0.00329037	0.0355613	0.0305058	477/6476/6523/3938/482/2538/6518/6514/8972	9
hsa04915	Estrogen signaling pathway	19/562	138/7893	0.00402338	0.041873	0.0359203	3883/84699/5241/2775/3881/25984/3882/3306/3872/7031/2852/192666/3866/3860/54474/111/810/3868/3861	19
hsa04261	Adrenergic signaling in cardiomyocytes	20/562	149/7893	0.00431266	0.0432806	0.0371278	477/84699/815/7134/482/7137/59285/5502/6332/7168/59283/185/491/783/154/146/111/810/7169/5350	20
hsa04614	Renin-angiotensin system	6/562	23/7893	0.00449869	0.0435908	0.0373939	1215/59272/185/1636/290/4311	6

## Sheet: Table 5 GO Functional
ID	Description	GeneRatio	BgRatio	pvalue	p.adjust	qvalue	geneID	Count
GO:0070268	cornification	46/1214	112/17913	6.3223e-25	3.13586e-21	2.77183e-21	KRT33A/PKP1/TGM1/KRT31/TGM5/KRT23/KRT32/PPL/CSTA/KRT17/SPINK5/DSG3/DSG1/DSC3/KRT7/FLG/LCE3D/IVL/SPRR3/SPRR2D/TMEM79/KLK13/KRT1/KRT24/SPRR1B/SPRR1A/KRT78/KRT6C/KRT4/KRT83/KRT15/KRT13/KRT20/KRT2/KRT6B/KRT73/KRT5/KRT3/KLK12/KRT16/KRT14/LOR/CDSN/KRT6A/RPTN/SPRR2A	46
GO:0008544	epidermis development	85/1214	452/17913	3.9798e-18	3.94796e-15	3.48966e-15	KRT33A/LAMC2/TP63/PKP1/TGM1/KRT31/TGM5/CNFN/SFRP4/DKK1/KRT23/KRT32/FOXN1/CYP27B1/RBP2/PPL/CSTA/INHBA/HOXC13/SOX21/TGM3/KRT17/SPINK5/EMP1/DSG3/DSG1/DSC3/ANXA1/KRT7/SCEL/LGR5/ZNF750/CRABP2/FLG2/S100A7/FLG/CERS3/GRHL3/LCE3D/IVL/SPRR3/SPRR2D/TMEM79/AQP3/KLK13/KRT1/ACER1/KRT24/SPRR1B/SPRR1A/BNC1/KRT78/KRT6C/KRT4/KRT83/SOSTDC1/KRT15/KRT13/KRT20/KRT2/FOXE1/ALOX15B/KRT6B/KRTAP5-5/LCE3A/LCE3E/KRT73/KRT5/L…	85
GO:0007586	digestion	40/1214	132/17913	2.3638e-16	1.67492e-13	1.48049e-13	TAC1/GUCA2B/SLC46A1/SI/PGC/SLC5A1/CCKBR/LCT/APOA1/CHIT1/CHIA/CD36/CAPN9/ABCG5/SLC2A5/ABCG8/UCN2/FABP2/AKR1C2/SST/GHRL/APOA2/NEUROD1/ALPI/SLC2A2/FABP1/MOGAT2/GKN1/LEP/UCN3/SLC9A4/AKR1C1/ASAH2/CLPSL2/GUCA2A/CLPSL1/PGA4/PGA3/PGA5/MGAM	40
GO:0042445	hormone metabolic process	46/1214	215/17913	2.05881e-12	1.27646e-09	1.12828e-09	RDH8/AFP/CMA1/DHRS2/CGB3/SLC5A5/CYP27B1/GHR/SLC5A7/APOA1/SPP1/LRAT/PCSK2/ACE2/BCO1/DUOX1/CYP19A1/RDH12/DUOXA1/CYP11A1/CYP1A1/CRABP2/CORIN/CYP17A1/AKR1C2/ACE/CYP3A4/CYP11B1/KLK6/SERPINA6/UGT2B7/LEP/GCNT4/FOXE1/AKR1C1/SULT1A1/MME/AKR1B10/ADH4/HSD3B1/UGT2B11/AKR1B15/UGT1A1/UGT1A3/UGT1A7/DHRS11	46
GO:0006936	muscle contraction	58/1214	343/17913	8.31325e-11	4.58153e-08	4.04967e-08	HSPB6/EHD3/ATP1A2/MYLK/TACR2/ACTN2/GNAO1/NOS1/SMPX/SORBS1/MYL9/COMP/SGCA/MYH1/CRYAB/KCNA1/TNNC1/CASQ2/MYOT/EDN3/EDN2/CSRP3/TNNI3/KCNA5/CNN1/ACE2/CKMT2/MYH11/SPX/SCN7A/TMOD1/SULF1/CHRNA1/TPM1/MYOCD/KCNMA1/GHRL/KCNE2/ACTG2/LMOD3/LMOD1/GPER1/CACNB2/DES/TRIM72/SYNM/NKX2-5/NEB/CTNNA3/SMTN/NPY2R/P2RX2/MYBPC1/TPM2/PLN/KLHL41/MYH4/FXYD1	58
GO:0043062	extracellular structure organization	61/1214	387/17913	5.04327e-10	2.27405e-07	2.01007e-07	NOX1/IBSP/GPM6B/LAMC2/COL11A1/ITGA8/FAP/CPB2/COL19A1/APOB/ADAMTS2/CMA1/MMP11/COMP/SERPINE1/COL1A1/APOA4/APOC3/NR2E1/SMOC2/MFAP2/MMP8/APOA1/SPP1/COL10A1/APOC1/MATN3/MYH11/SPINK5/CD36/SULF1/MMP7/MMP13/ADAMTS14/MTTP/AGTR1/PLA2G7/ADAM12/MMP3/DSPP/DMP1/ABI3BP/ACAN/APOA2/SCUBE1/ALB/MELTF/TNFRSF11B/MMP10/TNXB/COL3A1/FGB/HPSE2/ADAMTS20/BGN/WT1/COL4A5/MMP1/COL4A6/CAPNS2/MMP12	61
GO:0018149	peptide cross-linking	15/1214	34/17913	1.46232e-09	6.04424e-07	5.34259e-07	TGM1/TGM5/CSTA/TGM3/ANXA1/FLG/IVL/TGM6/KRT1/COL3A1/SPRR1B/SPRR1A/KRT2/BGN/LOR	15
GO:0006721	terpenoid metabolic process	25/1214	106/17913	2.90773e-08	9.6149e-06	8.49874e-06	RDH8/LRP2/APOB/CYP2D6/APOA4/APOC3/RBP2/APOA1/LRAT/BCO1/STRA6/CYP2C9/RDH12/CYP1A1/CRABP2/LRP8/APOA2/CYP3A4/AKR1C1/ADH7/AKR1B10/ADH4/UGT1A1/UGT1A3/UGT1A7	25
GO:0050892	intestinal absorption	14/1214	36/17913	3.69801e-08	1.14638e-05	1.0133e-05	SLC46A1/SLC5A1/APOA1/CD36/ABCG5/SLC2A5/ABCG8/FABP2/APOA2/SLC2A2/FABP1/MOGAT2/LEP/AKR1C1	14
GO:0003002	regionalization	49/1214	318/17913	5.35086e-08	1.56119e-05	1.37996e-05	HOXA11/HOXC8/TP63/WNT8B/PAX2/HOXA9/LRP2/DLL3/SFRP1/WNT2/EVX1/LHX3/DKK1/ZBTB16/OTX1/HOXC13/HOXC11/SIX1/FEZF1/HOXD10/HOXD11/HOXD13/FOXJ1/BARX1/EMX1/NKX2-1/LMX1B/SIX3/NKX6-2/BTG2/FOXH1/TDRD5/NEUROD1/EN1/NKX6-1/SP8/OTX2/IRX1/HOXB9/SOSTDC1/ALX1/HOXC9/HOXC10/NKX2-5/WT1/XRCC2/ARC/HOXA10/LHX1	49
GO:0050891	multicellular organismal water homeostasis	19/1214	68/17913	7.37406e-08	1.92502e-05	1.70155e-05	TFAP2B/TP63/ALOX12/ATP6V1B1/FLG2/FLG/GRHL3/TMEM79/AQP3/SCNN1G/AQP2/KRT1/ACER1/SCNN1B/AQP4/ADCY5/CYP4F2/KRT16/BPIFA1	19
GO:0043270	positive regulation of ion transport	43/1214	266/17913	8.77511e-08	2.17623e-05	1.9236e-05	EHD3/CNTN1/FHL1/MYLK/CAMK2A/TACR2/ACTN2/ADCYAP1R1/NOS1/TREM2/CEMIP/SLC6A4/KCNA1/GCG/APOA1/TNFSF11/EDN3/HSPA2/ATP1B2/ACE2/EPHB2/CXCL9/KCNMB1/JPH2/AKAP6/KCNE2/LRRC52/GPER1/CACNB2/CXCL10/CXCL11/ADRB2/LPAR3/LEP/ERFE/F2/NKX2-5/NPY2R/CYP4F2/NPSR1/P2RX2/PIRT/FXYD1	43
GO:0019730	antimicrobial humoral response	24/1214	106/17913	1.25656e-07	2.70979e-05	2.39522e-05	LTF/BPIFB2/PGC/ACOD1/SEMG2/SEMG1/CXCL6/DEFB126/BPIFA2/JCHAIN/SPINK5/IL36RN/S100A8/S100A7/PGLYRP3/S100A9/LEAP2/DEFA5/DEFA6/RNASE7/FGB/F2/BPIFA1/KRT6A	24
GO:0015850	organic hydroxy compound transport	38/1214	228/17913	2.19639e-07	4.53921e-05	4.01227e-05	PON1/TAC1/GPM6B/FGF20/SLCO1A2/APOB/NOS1/SLC6A4/APOA4/APOC3/SLCO1B3/APOA1/SPP1/APOC1/SLCO1B1/CD36/STRA6/CYP19A1/ABCG5/AQP10/ABCG8/AGTR1/GHRL/KCNB1/SLC5A11/APOA2/SLC51A/CARTPT/AQP7/AQP3/GALR1/AQP2/PCSK9/LEP/MAPK15/NPY2R/SLC51B/AKR1C1	38
GO:0030104	water homeostasis	19/1214	74/17913	3.1898e-07	6.32856e-05	5.5939e-05	TFAP2B/TP63/ALOX12/ATP6V1B1/FLG2/FLG/GRHL3/TMEM79/AQP3/SCNN1G/AQP2/KRT1/ACER1/SCNN1B/AQP4/ADCY5/CYP4F2/KRT16/BPIFA1	19
GO:0030574	collagen catabolic process	13/1214	37/17913	4.58426e-07	8.1207e-05	7.17799e-05	FAP/COL19A1/ADAMTS2/MMP11/MMP8/MMP7/MMP13/ADAMTS14/MMP3/MMP10/KLK6/MMP1/MMP12	13
GO:0045104	intermediate filament cytoskeleton organization	13/1214	42/17913	2.38733e-06	0.000370036	0.00032708	PKP1/NEFM/KRT17/INA/KRT6C/KRT20/KRT2/DES/SYNM/KRT3/KRT16/KRT14/NEFL	13
GO:0045103	intermediate filament-based process	13/1214	43/17913	3.21069e-06	0.000482577	0.000426556	PKP1/NEFM/KRT17/INA/KRT6C/KRT20/KRT2/DES/SYNM/KRT3/KRT16/KRT14/NEFL	13
GO:0050886	endocrine process	18/1214	80/17913	5.07983e-06	0.000719884	0.000636315	TAC1/NOX1/TACR2/CMA1/INHBA/INHA/EDN3/EDN2/ACE2/AGTR1/CORIN/GHRL/ACE/GALR1/APLN/LEP/FOXL2/MME	18
GO:0060537	muscle tissue development	51/1214	392/17913	5.45849e-06	0.000752059	0.000664755	COL11A1/MYLK/PITX1/ACTN2/ITGA8/FGF20/LRP2/COL19A1/ASB2/MYOM1/NDRG4/WNT2/DKK1/HLF/PHOX2B/HAND1/TNNC1/SMYD1/PROX1/CENPF/SIX1/FOXP2/HOXD10/CSRP3/SOX15/TNNI3/MYH11/STRA6/CHRNA1/TPM1/MYOCD/ANKRD1/VAX1/JPH2/AKAP6/BTG2/S100B/FOXH1/LMOD3/PI16/ANKRD33/COL3A1/SHOX2/MYOZ2/NKX2-5/FOXL2/WT1/FGF3/P2RX2/PLN/KLHL41	51
GO:0055067	monovalent inorganic cation homeostasis	23/1214	122/17913	6.60076e-06	0.000861573	0.000761556	PDK4/TAC1/NOX1/TFAP2B/ATP1A2/ATP12A/SLC26A3/UPK3A/CCKBR/ATP6V1B1/ATP1B2/KCNA5/SPX/SCN7A/RHCG/AGTR1/CORIN/KCNMA1/SCNN1G/SCNN1B/CA7/AQP11/CYP4F2	23
GO:0030326	embryonic limb morphogenesis	23/1214	123/17913	7.60631e-06	0.000888549	0.0007854	HOXA11/DLX6/PITX1/TP63/HOXA9/SALL4/DKK1/ZBTB16/TBX4/HOXC11/HOXD10/HOXD13/CRABP2/RSPO2/EN1/HAND2/SP8/SHOX2/HOXD12/ALX1/HOXC10/SP9/HOXA10	23
GO:0046503	glycerolipid catabolic process	14/1214	53/17913	7.88229e-06	0.000888549	0.0007854	APOB/PNPLA5/APOA4/APOC3/AADAC/APOC1/FABP2/APOA2/PLA2G4D/FABP1/ENPP6/FABP7/FABP4/FABP12	14
GO:0071542	dopaminergic neuron differentiation	11/1214	35/17913	1.21423e-05	0.00130925	0.00115727	FGF20/SFRP1/WNT2/DKK1/PHOX2B/LMX1B/RSPO2/EN1/VEGFD/PHOX2A/OTX2	11
GO:0061844	antimicrobial humoral immune response mediated by antimicrobial peptide	14/1214	55/17913	1.25636e-05	0.00132586	0.00117195	LTF/PGC/SEMG1/CXCL6/DEFB126/SPINK5/S100A7/PGLYRP3/S100A9/DEFA5/RNASE7/F2/BPIFA1/KRT6A	14
GO:0006805	xenobiotic metabolic process	21/1214	110/17913	1.3424e-05	0.00138715	0.00122612	CYP2W1/CYP2D6/CYP2C18/ALDH3A1/GHR/BCHE/AADAC/ACY3/BAAT/CYP2C9/CYP1A1/NAT2/CYP3A4/AKR7A3/AKR1C1/SULT1A1/SULT1A2/UGT2B11/UGT1A1/UGT1A3/UGT1A7	21
GO:0017001	antibiotic catabolic process	12/1214	42/17913	1.46288e-05	0.00145475	0.00128587	SULT2A1/APOA4/ALDH3B2/DUOX1/ADH7/SULT1A1/SULT1A2/AKR1B10/HBA1/GPX3/UGT1A1/HBB	12
GO:0034378	chylomicron assembly	6/1214	10/17913	1.58577e-05	0.00154224	0.00136321	APOB/APOA4/APOC3/APOA1/MTTP/APOA2	6
GO:0007588	excretion	15/1214	64/17913	1.8257e-05	0.00167694	0.00148227	TAC1/GUCA2B/TACR2/SLC26A3/ATP6V1B1/SPX/ABCG5/ABCG8/AGTR1/CORIN/KCNMA1/SCNN1G/SCNN1B/CLCNKA/UGT1A7	15
GO:0050909	sensory perception of taste	14/1214	57/17913	1.95456e-05	0.00174748	0.00154462	CST4/PKD2L1/CA6/REEP2/CD36/PIP/LCN1/SCNN1G/SCNN1B/CST2/CST1/TAS2R60/P2RX2/TAS2R38	14
GO:1900047	negative regulation of hemostasis	13/1214	50/17913	1.99588e-05	0.00174748	0.00154462	FAP/CPB2/F11/COMP/SERPINE1/ALOX12/KNG1/PLAU/ADAMTS18/KRT1/FGB/F2/SERPINB2	13
GO:0042730	fibrinolysis	9/1214	25/17913	2.21621e-05	0.00180203	0.00159284	FAP/CPB2/F11/SERPINE1/PLAU/KRT1/FGB/F2/SERPINB2	9
GO:0030239	myofibril assembly	13/1214	51/17913	2.51391e-05	0.0019823	0.00175219	ACTN2/PROX1/CASQ2/LDB3/CSRP3/MYH11/TPM1/ANKRD1/LMOD3/SYNPO2L/MYOZ2/NKX2-5/KLHL41	13
GO:0007292	female gamete generation	23/1214	132/17913	2.51785e-05	0.0019823	0.00175219	ASPM/TRIP13/AFP/PGR/PABPC1L/CGB3/AMH/PTN/INHBA/TOP2A/LGR5/HORMAD1/STRA8/ADAMTS1/M1AP/TDRD5/NPPC/HPGD/SOHLH1/LEP/C14orf39/FOXL2/MEIKIN	23
GO:1905952	regulation of lipid localization	25/1214	151/17913	2.80901e-05	0.00217699	0.00192427	PON1/TAC1/APOB/APOA4/APOC3/APOA1/SPP1/TNFSF11/LRAT/APOC1/CRP/CD36/CYP19A1/ABCG5/ABCG8/AGTR1/GHRL/APOA2/GALR1/PCSK9/VSTM2A/LEP/CIDEA/ERFE/CYP4F2	25
GO:0008202	steroid metabolic process	42/1214	321/17913	3.13973e-05	0.00235883	0.002085	PON1/CYP24A1/RDH8/AFP/LRP2/APOB/CYP2D6/DHRS2/SULT2A1/APOA4/CYP27B1/PROX1/APOA1/SPP1/APOC1/G6PC/BAAT/CYP19A1/CYP2C9/CYP11A1/CYP1A1/AGTR1/CYP17A1/AKR1C2/APOA2/CYP3A4/CYP11B1/FGF19/PCSK9/NR0B1/SERPINA6/UGT2B7/LEP/AKR1C1/SULT1A1/SULT1A2/UGT2B17/HSD3B1/UGT2B11/AKR1B15/UGT1A1/DHRS11	42
GO:1903522	regulation of blood circulation	39/1214	292/17913	3.75289e-05	0.00269773	0.00238456	TAC1/EHD3/ATP1A2/GNAO1/NOS1/CASQ2/POPDC2/EDN3/EDN2/CSRP3/ATP1B2/TNNI3/KCNA5/ACE2/CACNG6/SPX/FXYD6/TPM1/CACNG8/AGTR1/CORIN/GHRL/ATP2B2/KCNE2/ACE/NPPC/CACNB2/APLN/FGB/HSPB7/LEP/DES/CHRM2/NKX2-5/CTNNA3/PLN/RYR3/APELA/FXYD1	39
GO:0010466	negative regulation of peptidase activity	32/1214	223/17913	4.55446e-05	0.00301201	0.00266236	TFAP2B/LTF/SERPINB3/PAX2/FETUB/R3HDML/CST4/ITIH6/SERPINE1/CRYAB/CSTA/CSTL1/SPINK5/ECM1/SPINK7/ITIH2/CSTB/LCN1/FABP1/PI16/A2ML1/WFDC12/CST2/CST1/WFIKKN2/WFDC5/WFDC10A/SERPINB13/SERPINB4/MAGEA3/SPINK8/ANXA8	32
GO:0060065	uterus development	8/1214	22/17913	5.89476e-05	0.00370101	0.00327137	HOXA11/HOXA9/STRA6/CYP19A1/MYOCD/FOXL2/HOXA10/LHX1	8
GO:0034367	protein-containing complex remodeling	9/1214	28/17913	6.22522e-05	0.0037655	0.00332837	APOB/APOA4/APOC3/APOA1/APOC1/AGTR1/PLA2G7/APOA2/ALB	9
GO:0034368	protein-lipid complex remodeling	9/1214	28/17913	6.22522e-05	0.0037655	0.00332837	APOB/APOA4/APOC3/APOA1/APOC1/AGTR1/PLA2G7/APOA2/ALB	9
GO:0034369	plasma lipoprotein particle remodeling	9/1214	28/17913	6.22522e-05	0.0037655	0.00332837	APOB/APOA4/APOC3/APOA1/APOC1/AGTR1/PLA2G7/APOA2/ALB	9
GO:0010876	lipid localization	45/1214	366/17913	7.6689e-05	0.00437216	0.00386461	PON1/TAC1/SLCO1A2/APOB/APOA4/APOC3/SLCO1B3/SLC27A6/APOA1/SPP1/TNFSF11/LRAT/INHBA/LBP/APOC1/CRP/CFHR4/SLCO1B1/SPX/CD36/STRA6/CYP19A1/ABCG5/PLA2G12B/MTTP/ABCG8/AGTR1/FABP2/GHRL/APOA2/ACE/LCN1/FABP1/SLC51A/GALR1/PCSK9/FABP4/VSTM2A/LEP/CIDEA/ERFE/CYP4F2/SLC51B/AKR1C1/PLA2G2C	45
GO:0003044	regulation of systemic arterial blood pressure mediated by a chemical signal	11/1214	43/17913	0.00010134	0.00552357	0.00488235	NOX1/CMA1/EDN3/EDN2/ACE2/TPM1/SLC2A5/AGTR1/CORIN/ACE/MME	11
GO:0006775	fat-soluble vitamin metabolic process	11/1214	43/17913	0.00010134	0.00552357	0.00488235	CYP24A1/LRP2/CYP27B1/RBP2/LRAT/BCO1/CYP11A1/CYP1A1/CBR1/CYP3A4/CYP4F2	11
GO:0052695	cellular glucuronidation	7/1214	18/17913	0.000105715	0.0056994	0.00503777	UGT2B7/UGT2B17/UGT2B11/UGT1A1/UGT1A3/UGT1A7/UGT1A4	7
GO:0046883	regulation of hormone secretion	34/1214	254/17913	0.000110273	0.00574693	0.00507979	TAC1/TFAP2B/TACR2/IL11/SFRP1/GCG/SPP1/TNFSF11/INHBA/INHA/EDN3/LIF/KCNA5/GRP/ANXA1/CYP19A1/AGTR1/HTR2C/GHRL/KCNB1/GIP/NEUROD1/SLC2A2/NKX6-1/CARTPT/GPER1/GALR1/APLN/FGB/ADCY5/LEP/UCN3/FOXL2/CACNA1E	34
GO:0007218	neuropeptide signaling pathway	14/1214	66/17913	0.000110883	0.00574693	0.00507979	TAC1/SORCS1/GRPR/GRP/NPFFR1/SORCS3/CARTPT/TAC3/ECEL1/NXPH4/PMCH/NPY2R/MC2R/NPSR1	14
GO:0060047	heart contraction	36/1214	275/17913	0.000111231	0.00574693	0.00507979	TAC1/EHD3/ATP1A2/GNAO1/NOS1/TNNC1/CASQ2/POPDC2/EDN3/EDN2/CSRP3/ATP1B2/TNNI3/KCNA5/ACE2/CACNG6/SPX/FXYD6/TPM1/CACNG8/CORIN/ATP2B2/KCNE2/ACE/NPPC/CACNB2/APLN/HSPB7/DES/CHRM2/NKX2-5/CTNNA3/PLN/RYR3/APELA/FXYD1	36
GO:0048562	embryonic organ morphogenesis	36/1214	276/17913	0.000119775	0.00601256	0.00531458	HOXA11/DLX6/COL11A1/NTN1/PAX2/ITGA8/WNT11/NDRG4/HAND1/OTX1/ATP6V1B1/MFAP2/PROX1/NR4A3/GJB6/HOXC11/STIL/SIX1/HOXD10/EPHB2/STRA6/SIX3/LBX1/GRHL3/FOXH1/NEUROD1/HAND2/CTHRC1/RBPMS2/SHOX2/FOXE1/HOXC9/USH1G/NKX2-5/FOXL2/LHX1	36
GO:0008210	estrogen metabolic process	8/1214	24/17913	0.000120009	0.00601256	0.00531458	RDH8/CYP19A1/SULT1A1/HSD3B1/UGT2B11/AKR1B15/UGT1A1/DHRS11	8
GO:0042759	long-chain fatty acid biosynthetic process	8/1214	25/17913	0.000166054	0.00777008	0.00686808	CYP2D6/ALOX12/PLP1/CYP2C9/CYP1A1/CYP3A4/HPGD/ALOX15B	8
GO:0050819	negative regulation of coagulation	12/1214	53/17913	0.000176392	0.00810099	0.00716057	FAP/CPB2/F11/SERPINE1/ALOX12/KNG1/PLAU/ADAMTS18/KRT1/FGB/F2/SERPINB2	12
GO:0030049	muscle filament sliding	10/1214	39/17913	0.00020436	0.0089758	0.00793383	ACTN2/TNNC1/TNNI3/TMOD1/TPM1/DES/NEB/MYBPC1/TPM2/MYH4	10
GO:0033275	actin-myosin filament sliding	10/1214	39/17913	0.00020436	0.0089758	0.00793383	ACTN2/TNNC1/TNNI3/TMOD1/TPM1/DES/NEB/MYBPC1/TPM2/MYH4	10
GO:0034308	primary alcohol metabolic process	15/1214	78/17913	0.000204489	0.0089758	0.00793383	RDH8/SULT2A1/LRAT/ALDH3B2/BCO1/RDH12/AKR1C2/CYP11B1/AKR1C1/ADH7/SULT1A1/ADH1B/SULT1A2/AKR1B10/ADH4	15
GO:1905954	positive regulation of lipid localization	15/1214	78/17913	0.000204489	0.0089758	0.00793383	PON1/TAC1/APOB/APOA1/SPP1/TNFSF11/LRAT/CD36/CYP19A1/GHRL/GALR1/VSTM2A/CIDEA/ERFE/CYP4F2	15
GO:0046660	female sex differentiation	19/1214	114/17913	0.000226509	0.00969574	0.00857019	TP63/ADCYAP1R1/AFP/LRP2/PGR/SFRP1/AMH/INHBA/INHA/STRA6/CYP19A1/LHX9/ADAMTS1/LEP/DMRTA1/ZFP42/FOXL2/WT1/LHX1	19
